# Supplementary material
Source: PubMed Central journal article supplement (PMC4468534)
Supplement: IAI.03083-14_zii999091278so1.pdf [file IAI.03083-14_zii999091278so1.pdf]

# Figure S1



**Figure S1:**

**Loss of c-Jun protein results in a reduction of the MOMP protein.**

HEp-2 cells were treated with c-Jun siRNA (c-Jun KD), allstar siRNA or transfection reagent (mock). **(A-B)** Western Blot analysis was used to determine c-Jun knockdown efficacy in HEp-2 cells 24 hours post transfection (24 hpt) **(A)** and 24, 48 and 72 hours post *C. pneumoniae* (*Cpn*) infection (hpi) **(B)**. **(C)** Western Blot analysis of MOMP protein 48 hpi. **(D)** Quantification of protein MOMP expression 48 hpi using densitometry, normalized to control. Data represent the mean  $\pm$  SD. Data and immunoblots are representative of at least three independent experiments (n = 4-7).

# Figure S2



**Figure S2:**

**Tanshinone IIA treatment reduces MOMP and the MOMP:cHsp60 ratio**

HEp-2 cells were infected with 10 IFUs of *C. pneumoniae* (*Cpn*) and in parallel treated with (w/) or without (w/o) Tanshinone IIA (TIIA, 25  $\mu$ M). As control uninfected cells w/ and w/o TIIA treatment were used. **(A)** Western Blot analysis of MOMP and cHsp60, 48 and 72 hpi. **(B)** Quantification of MOMP and cHsp60 protein expression using densitometry, normalized against infected cells w/o TIIA (dashed grey line). **(C)** Quantification of MOMP:cHsp60 ratio based on the protein expression data, normalized to control. **(D)** Relative gene expression of MOMP and cHsp60 4, 24, 48 and 72 hpi, normalized against infected cells w/o TIIA (dashed grey line). Data, presented as mean  $\pm$  SD, are representative of three independent experiments (n = 3). \*p<0.05, \*\*p<0.01
